# Supplementary material for: Increase in local protein concentration by field-inversion gel electrophoresis
Source: Springer Nature journal article supplement (doi:10.1186/1477-5956-5-18), 2007-01-01

# Setup of Differential Field-Inversion Gel Electrophoresis

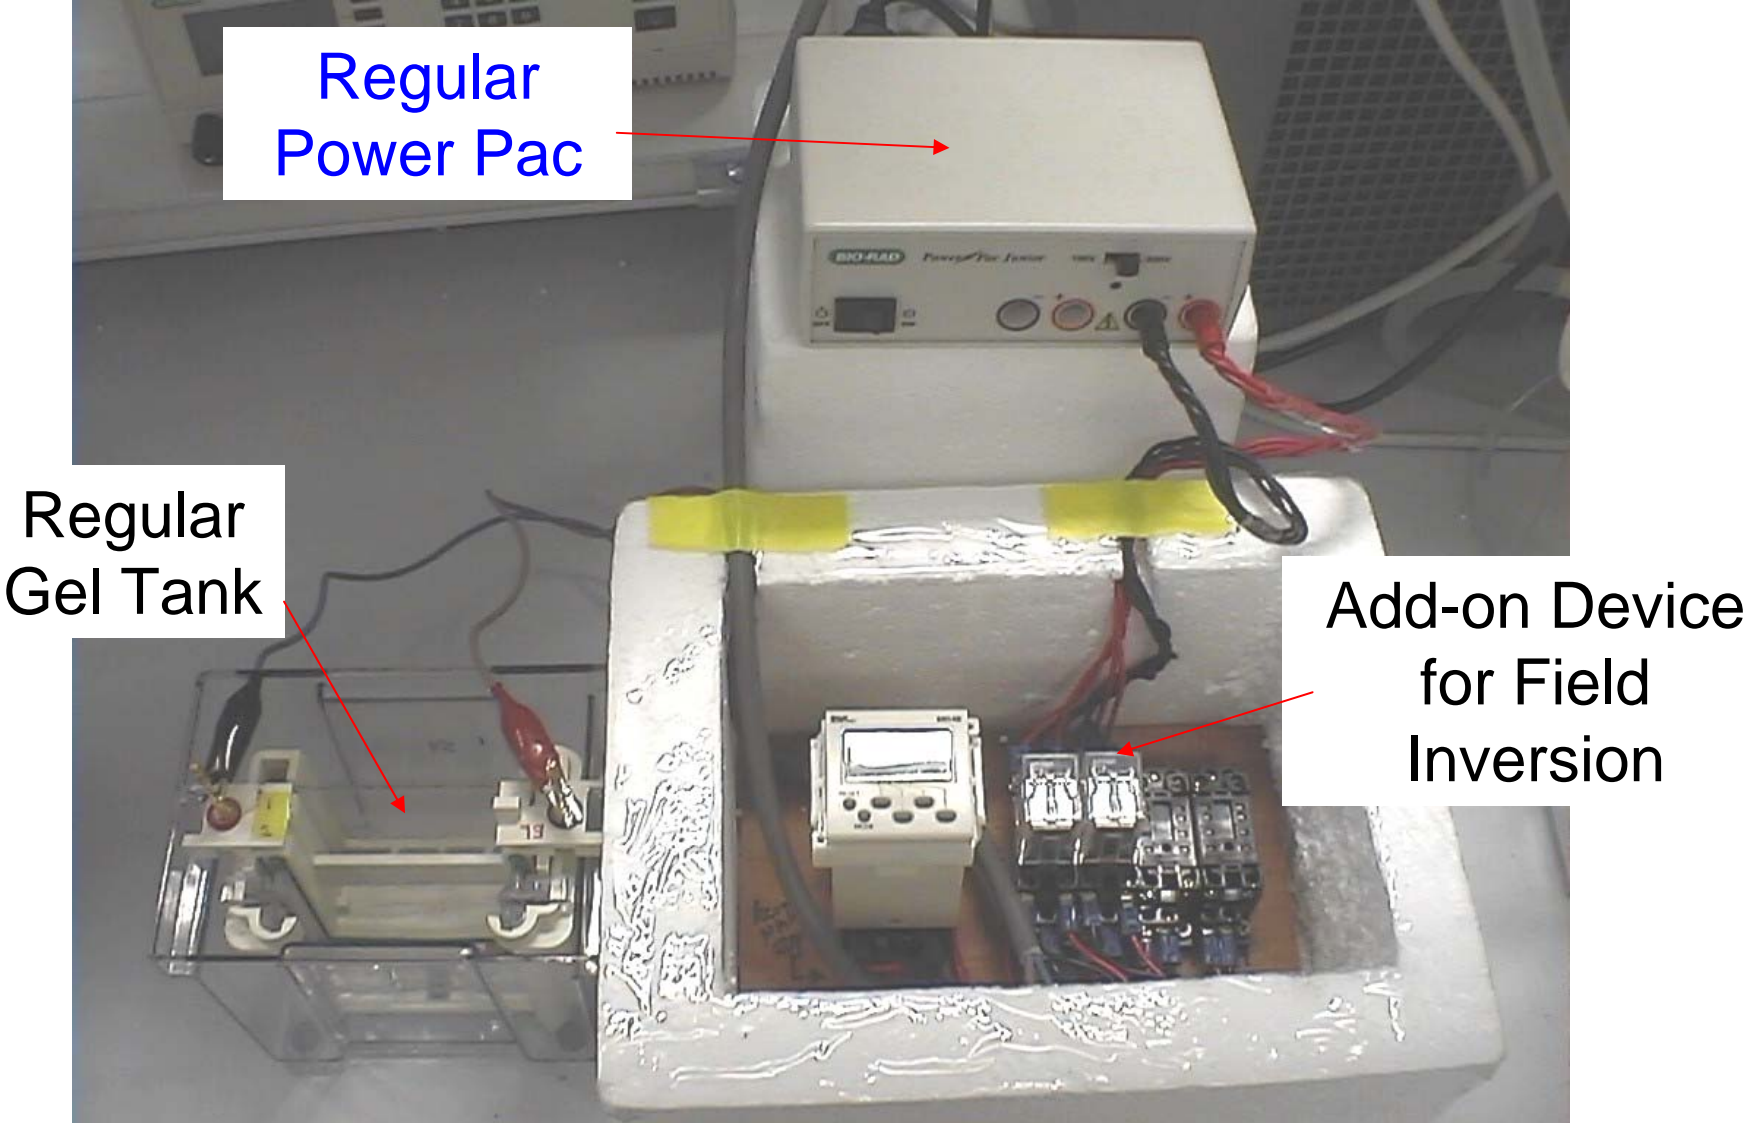

Supplement: Additional file 1 [file 1477-5956-5-18-s1.pdf]
